# Supplementary material for: Development of a Food-Based Diet Quality Scale for Brazilian Schoolchildren Using Item Response Theory
Source: MDPI journal article supplement (doi:10.3390/nu13093175), 2021-09-12
Supplement: s1 [file s1]

## Supplementary Materials

**Table S1.** Factor loadings for each item generated by full-information factor analysis.

| Item                                          | Factor loadings |
|-----------------------------------------------|-----------------|
| 1. Cereals, pasta, breads, roots, and tubers  | 0.37            |
| 2. Beans                                      | 0.53            |
| 3. Vegetables and leafy greens                | 0.41            |
| 4. Fruits                                     | 0.40            |
| 5. Dairy products                             | 0.49            |
| 6. Meat, fish, and eggs                       | 0.40            |
| 7. Ultraprocessed sugary foods                | 0.43            |
| 8. Sugary drinks                              | 0.38            |
| 9. Ultraprocessed savoury snacks and sausages | 0.52            |
| 10. Water                                     | 0.74            |
| Percent of explained variation                | 28.0%           |

**Table S2.** Characteristics of the representative sample analysed according to Schoolchildren's Diet Quality Scale levels in surveys 2013-2015 (*n* 6,323).

| Characteristics                                      | Survey year                               |                                           |                                           | Total<br>( <i>n</i> 6,323)<br><i>n</i> (%) |
|------------------------------------------------------|-------------------------------------------|-------------------------------------------|-------------------------------------------|--------------------------------------------|
|                                                      | 2013<br>( <i>n</i> 1,934)<br><i>n</i> (%) | 2014<br>( <i>n</i> 1,980)<br><i>n</i> (%) | 2015<br>( <i>n</i> 2,409)<br><i>n</i> (%) |                                            |
|                                                      |                                           |                                           |                                           |                                            |
| <b>Sex</b>                                           |                                           |                                           |                                           |                                            |
| Boys                                                 | 989 (51.1)                                | 982 (49.6)                                | 1,230 (51.1)                              | 3,201 (50.6)                               |
| Girls                                                | 945 (48.9)                                | 998 (50.4)                                | 1,179 (48.9)                              | 3,122 (49.4)                               |
| <b>Age (years) (Mean±SD)</b>                         | 9.6±1.2                                   | 9.5±1.1                                   | 9.7± 1.2                                  | 9.6±1.2                                    |
| <b>Weight status<sup>a</sup></b>                     |                                           |                                           |                                           |                                            |
| Non overweight                                       | 1,474 (76.2)                              | 1,432 (72.3)                              | 1,779 (73.8)                              | 4,685 (74.1)                               |
| Overweight (including obesity)                       | 460 (23.8)                                | 548 (27.7)                                | 630 (26.2)                                | 1,638 (25.9)                               |
| <b>Family income (R\$)<sup>b</sup><br/>(Mean±SD)</b> | 2,015±1,060                               | 2,053± for                                | 2,046±996                                 | 2,039±1,001                                |

<sup>a</sup>IOTF International Obesity Task Force [21]

<sup>b</sup>Monthly family income based on the school census sector [22]; 1 U\$ = R\$ 2,61 (average exchange rate between 2013 and 2015)

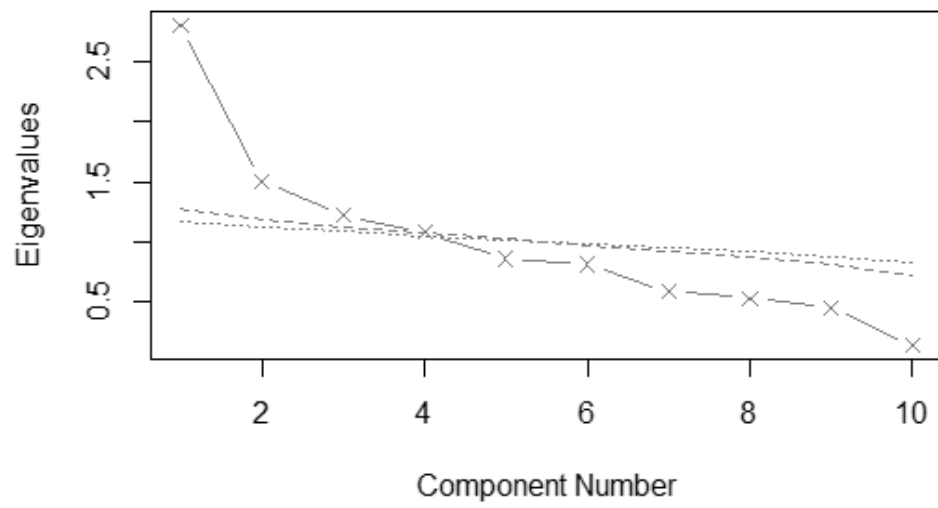

**Figure S1.** Scree plot of 10 items of Web-CAAFE (Food Intake and Physical Activities of Schoolchildren) from the full information factor analysis.

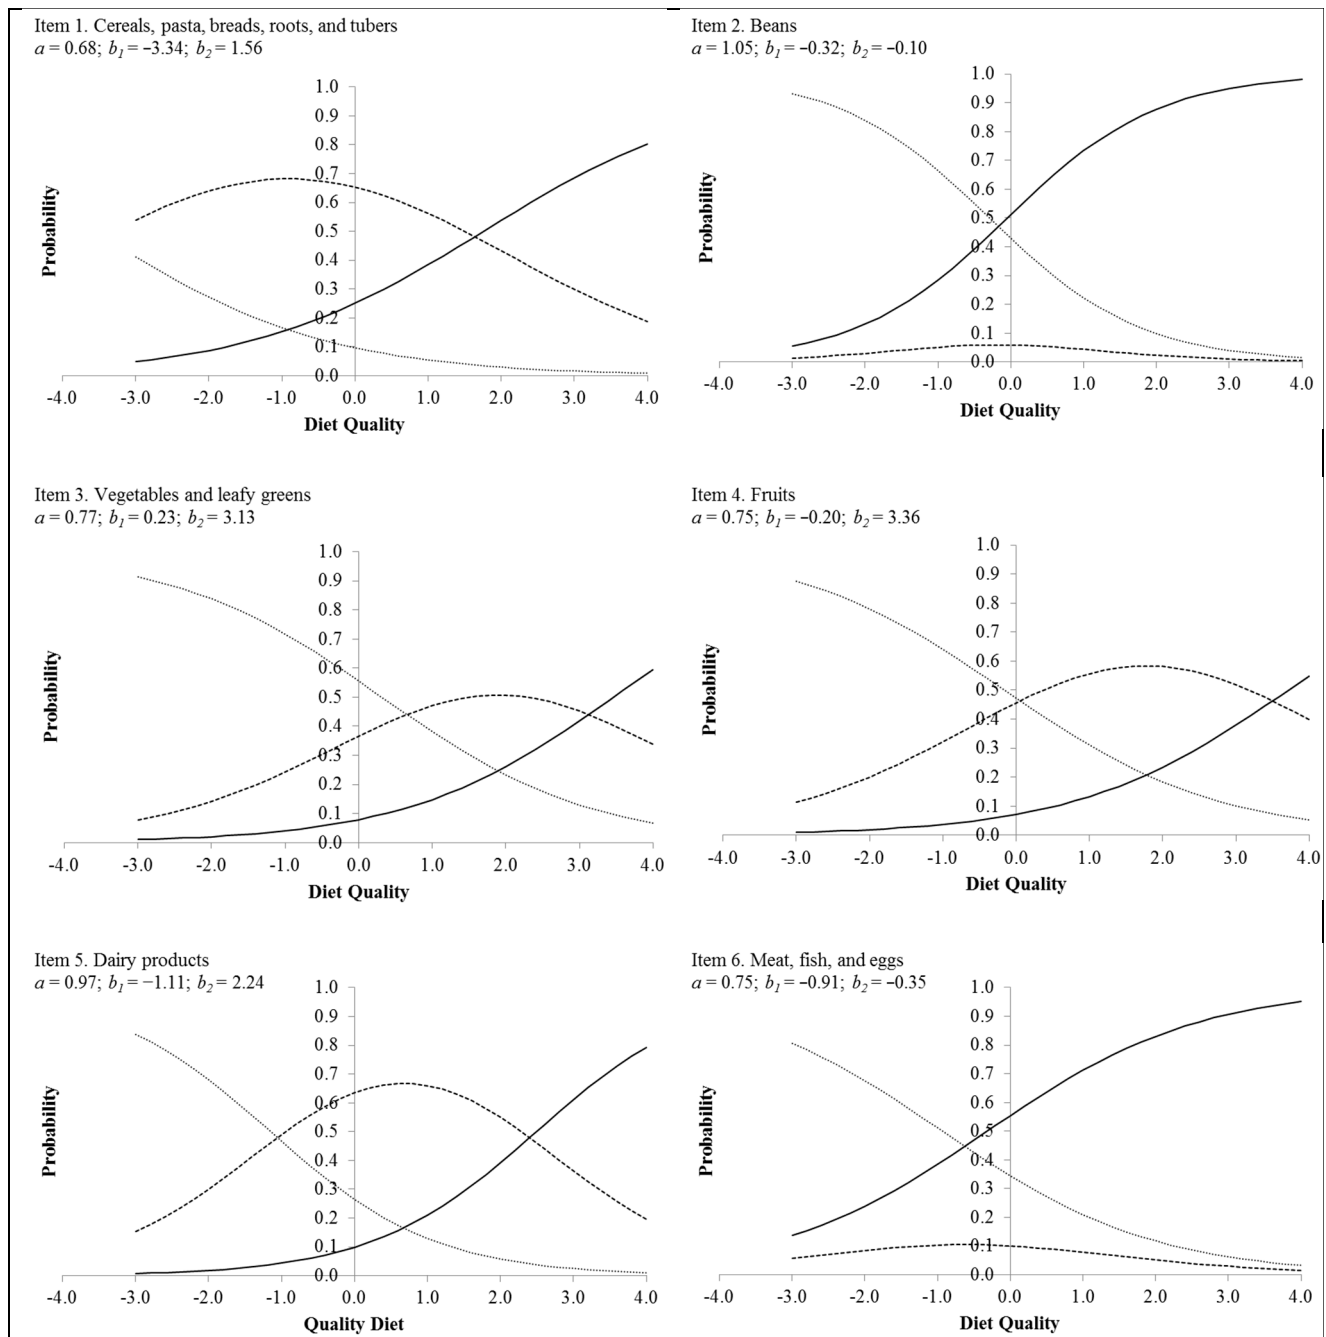

**Figure S2.** Healthy foods item's characteristic curves (The dotted line indicates the lower response category, the dashed line indicates the intermediate category, and the solid line indicates the higher category).

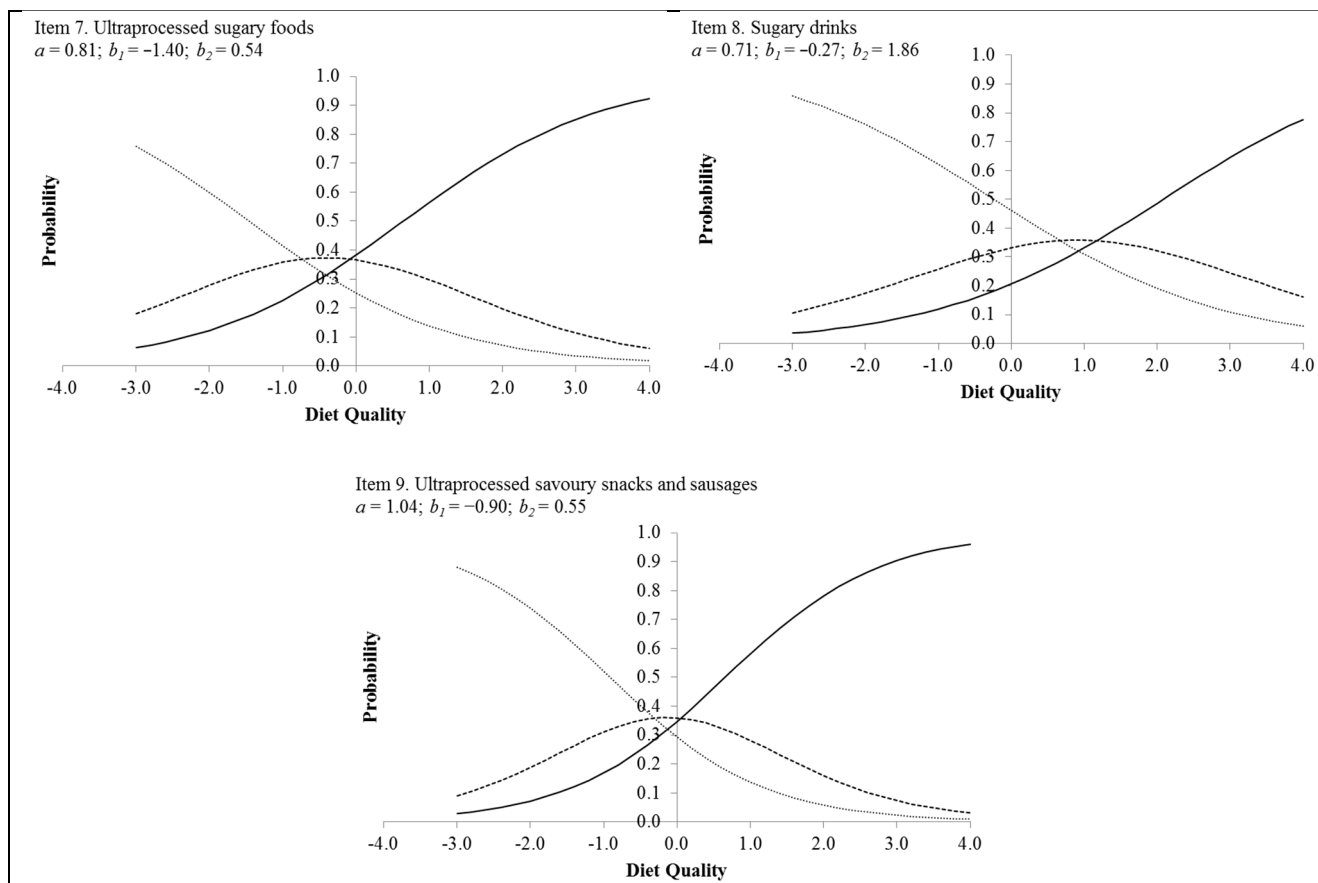

**Figure S3.** Unhealthy foods item's characteristic curves (The dotted line indicates the lower response category, the dashed line indicates the intermediate category, and the solid line indicates the higher category).
